# Supplementary material
Source: HighWire-hosted journal article supplement (https://rapm.bmj.com/content/44/2/192)
Supplement: inline-supplementary-material-2 [file inline-supplementary-material-2.docx]

**Supplementary Table 1. Summary of SNPs by acute pain category.**

|  | Maximum Acute Pain Category | | |
| --- | --- | --- | --- |
| Mild Pain (N=40) | Moderate Pain (N=40) | Severe Pain (N=44) |
| **rs1851048 C/T minor allele count** |  |  |  |
| 0 | 19 (52.78%) | 16 (41.03%) | 24 (61.54%) |
| 1 | 12 (33.33%) | 18 (46.15%) | 14 (35.90%) |
| 2 | 5 (13.89%) | 5 (12.82%) | 1 (2.56%) |
| **rs2284015 C/G minor allele count** |  |  |  |
| 0 | 20 (55.56%) | 27 (69.23%) | 23 (58.97%) |
| 1 | 15 (41.67%) | 11 (28.21%) | 11 (28.21%) |
| 2 | 1 (2.78%) | 1 (2.56%) | 5 (12.82%) |
| **rs2284017 C/T minor allele count** |  |  |  |
| 0 | 12 (33.33%) | 7 (17.95%) | 16 (41.03%) |
| 1 | 12 (33.33%) | 17 (43.59%) | 11 (28.21%) |
| 2 | 12 (33.33%) | 15 (38.46%) | 12 (30.77%) |
| **rs4820242 A/G minor allele count** |  |  |  |
| 0 | 17 (47.22%) | 16 (41.03%) | 17 (43.59%) |
| 1 | 14 (38.89%) | 17 (43.59%) | 18 (46.15%) |
| 2 | 5 (13.89%) | 6 (15.38%) | 4 (10.26%) |
| **rs6777055 A/C minor allele count** |  |  |  |
| 0 | 24 (66.67%) | 24 (61.54%) | 31 (79.49%) |
| 1 | 10 (27.78%) | 13 (33.33%) | 8 (20.51%) |
| 2 | 2 (5.56%) | 2 (5.13%) | 0 (0.00%) |
