# Supplementary material
Source: HighWire-hosted journal article supplement (https://rapm.bmj.com/content/44/2/192)
Supplement: inline-supplementary-material-3 [file inline-supplementary-material-3.docx]

**Supplementary Table 2. Summary of SNPs by persistent pain**

|  | No persistent  pain (N=53) | Persistent pain  (N=71) |
| --- | --- | --- |
| **rs1851048 C/T**  **minor allele count** |  |  |
| 0 | 23 (46.00%) | 36 (57.14%) |
| 1 | 21 (42.00%) | 22 (34.92%) |
| 2 | 6 (12.00%) | 5 (7.94%) |
| **rs2284015 C/G**  **minor allele count** |  |  |
| 0 | 28 (56.00%) | 42 (66.67%) |
| 1 | 18 (36.00%) | 18 (28.57%) |
| 2 | 4 (8.00%) | 3 (4.76%) |
| **rs2284017 C/T**  **minor allele count** |  |  |
| 0 | 20 (40.00%) | 15 (23.81%) |
| 1 | 15 (30.00%) | 24 (38.10%) |
| 2 | 15 (30.00%) | 24 (38.10%) |
| **rs4820242 A/G minor allele count** |  |  |
| 0 | 23 (46.00%) | 27 (42.86%) |
| 1 | 19 (38.00%) | 29 (46.03%) |
| 2 | 8 (16.00%) | 7 (11.11%) |
| **rs6777055 A/C**  **minor allele count** |  |  |
| 0 | 36 (72.00%) | 42 (66.67%) |
| 1 | 11 (22.00%) | 20 (31.75%) |
| 2 | 3 (6.00%) | 1 (1.59%) |
